# Supplementary material
Source: PubMed Central journal article supplement (PMC10411517)
Supplement: NIHMS1876070-supplement-1.pdf [file NIHMS1876070-supplement-1.pdf]

**Supplemental Table 1. Birthplace distribution by type of study participant**

---

|                      | <b>Cases<br/>N=728</b> |    | <b>Sister controls<br/>N=287</b> |    | <b>Unrelated<br/>controls<sup>1</sup><br/>N=82</b> |    | <b>Population<br/>controls<br/>N=85</b> |    |
|----------------------|------------------------|----|----------------------------------|----|----------------------------------------------------|----|-----------------------------------------|----|
|                      | N                      | %  | N                                | %  | N                                                  | %  | N                                       | %  |
| U.S.-born            | 153                    | 21 | 91                               | 32 | 24                                                 | 29 | 20                                      | 24 |
| Foreign-born         | 575                    | 79 | 196                              | 68 | 58                                                 | 71 | 65                                      | 76 |
| P value <sup>2</sup> |                        |    | <0.01                            |    | 0.09                                               |    | 0.60                                    |    |

---

<sup>1</sup> Sisters of cases who were ineligible for inclusion in the present analysis (e.g., cases with bilateral breast cancer).

<sup>2</sup> Chi square p value for comparison with cases.
