# Supplementary material
Source: PubMed Central journal article supplement (PMC10411517)
Supplement: NIHMS1876070-supplement-2.pdf [file NIHMS1876070-supplement-2.pdf]

**Supplemental Table 2. Prevalence of breast cancer risk factors: Comparison between Asian American controls, by birthplace and Asian ethnicity, and non-Hispanic White controls**

|                                                                 | Foreign-born Asian American controls <sup>1</sup> |    |                  |    |                   |    | U.S.-born Asian American controls <sup>2</sup> |    |                 |    |                  |    | U.S.-born NHW controls |    | Foreign-born vs. U.S.-born Asian Americans<br>Chi square<br><i>P</i> value <sup>3</sup> | U.S.-born Asian Americans controls vs. NHW controls<br>Chi square<br><i>P</i> value <sup>3</sup> |       |       |
|-----------------------------------------------------------------|---------------------------------------------------|----|------------------|----|-------------------|----|------------------------------------------------|----|-----------------|----|------------------|----|------------------------|----|-----------------------------------------------------------------------------------------|--------------------------------------------------------------------------------------------------|-------|-------|
|                                                                 | Asian American<br>N=319                           |    | Chinese<br>N=102 |    | Filipina<br>N=174 |    | Asian American<br>N=135                        |    | Chinese<br>N=57 |    | Filipina<br>N=22 |    | Japanese<br>N=51       |    |                                                                                         |                                                                                                  | N=937 |       |
|                                                                 | N                                                 | %  | N                | %  | N                 | %  | N                                              | %  | N               | %  | N                | %  | N                      | %  |                                                                                         |                                                                                                  | N     | %     |
| College graduate or higher degree                               | 189                                               | 59 | 61               | 60 | 105               | 60 | 75                                             | 56 | 37              | 65 | 6                | 27 | 31                     | 61 | 409                                                                                     | 44                                                                                               | 0.41  | 0.01  |
| Early menarche before age 12 years                              | 58                                                | 18 | 10               | 10 | 40                | 23 | 29                                             | 22 | 10              | 18 | 6                | 27 | 13                     | 25 | 178                                                                                     | 19                                                                                               | 0.37  | 0.45  |
| Nulliparous                                                     | 74                                                | 23 | 28               | 27 | 35                | 20 | 44                                             | 33 | 16              | 28 | 8                | 36 | 20                     | 39 | 227                                                                                     | 24                                                                                               | 0.06  | 0.049 |
| ≥3 full-term pregnancies <sup>4</sup>                           | 80                                                | 33 | 19               | 26 | 50                | 36 | 30                                             | 33 | 13              | 32 | 7                | 50 | 9                      | 29 | 256                                                                                     | 36                                                                                               | 0.96  | 0.23  |
| First full-term pregnancy at age ≥30 y <sup>4</sup>             | 88                                                | 36 | 35               | 47 | 44                | 32 | 26                                             | 29 | 17              | 41 | 2                | 14 | 7                      | 23 | 134                                                                                     | 19                                                                                               | 0.21  | 0.03  |
| History of breast-feeding (ever) <sup>4</sup>                   | 183                                               | 75 | 54               | 73 | 105               | 76 | 75                                             | 82 | 35              | 85 | 10               | 71 | 27                     | 87 | 509                                                                                     | 72                                                                                               | 0.14  | 0.03  |
| ≥13 months of breast-feeding <sup>2</sup>                       | 56                                                | 23 | 13               | 18 | 32                | 23 | 34                                             | 37 | 17              | 41 | 5                | 36 | 11                     | 35 | 221                                                                                     | 31                                                                                               | 0.01  | 0.23  |
| Oral contraceptive use (ever)                                   | 160                                               | 50 | 44               | 43 | 90                | 52 | 101                                            | 75 | 42              | 74 | 15               | 68 | 39                     | 76 | 787                                                                                     | 84                                                                                               | <0.01 | <0.01 |
| Menopausal hormone use (ever), postmenopausal women             | 62                                                | 48 | 18               | 51 | 34                | 44 | 36                                             | 69 | 12              | 67 | 0                | 0  | 23                     | 82 | 338                                                                                     | 71                                                                                               | 0.01  | 0.75  |
| BMI ≥27.5 kg/m <sup>2</sup> , premenopausal women <sup>5</sup>  | 23                                                | 12 | 4                | 6  | 18                | 19 | 15                                             | 18 | 4               | 10 | 7                | 39 | 4                      | 17 | 112                                                                                     | 24                                                                                               | 0.17  | 0.23  |
| BMI ≥27.5 kg/m <sup>2</sup> , postmenopausal women <sup>5</sup> | 23                                                | 18 | 2                | 6  | 16                | 21 | 12                                             | 23 | 2               | 11 | 2                | 50 | 8                      | 29 | 183                                                                                     | 39                                                                                               | 0.42  | 0.03  |
| Lifetime physical activity ≥29.6 MET-hours/week <sup>6</sup>    | 102                                               | 32 | 26               | 25 | 59                | 34 | 51                                             | 38 | 17              | 30 | 11               | 50 | 20                     | 39 | 402                                                                                     | 43                                                                                               | 0.29  | 0.22  |
| Cigarette smoking (ever)                                        | 32                                                | 10 | 5                | 5  | 25                | 14 | 36                                             | 27 | 12              | 21 | 8                | 36 | 13                     | 25 | 457                                                                                     | 49                                                                                               | <0.01 | <0.01 |

|                                                                               |     |    |    |    |     |    |     |    |    |    |    |    |    |    |     |    |       |       |
|-------------------------------------------------------------------------------|-----|----|----|----|-----|----|-----|----|----|----|----|----|----|----|-----|----|-------|-------|
| Alcohol consumption (ever)                                                    | 37  | 12 | 12 | 12 | 21  | 12 | 47  | 35 | 17 | 30 | 6  | 27 | 22 | 43 | 518 | 55 | <0.01 | <0.01 |
| <i>Participants with dietary data</i> <sup>7</sup>                            | 245 |    | 85 |    | 129 |    | 127 |    | 54 |    | 21 |    | 49 |    | 824 |    |       |       |
| Total isoflavone intake, highest tertile ( $\geq 2.80$ mg/day) <sup>5,8</sup> | 121 | 49 | 68 | 80 | 37  | 29 | 52  | 41 | 23 | 43 | 2  | 10 | 26 | 53 | 82  | 10 | 0.12  | <0.01 |
| Green, herbal or other tea <sup>5,9,10</sup> ( $\geq 2$ cups/day)             | 97  | 40 | 35 | 41 | 50  | 39 | 47  | 38 | 16 | 31 | 6  | 29 | 25 | 51 | 188 | 23 | 0.63  | <0.01 |

<sup>1</sup> Data are not shown for 9 foreign-born Japanese controls and 34 foreign-born other Asian controls.

<sup>2</sup> Data are not shown for 5 U.S.-born other Asian controls.

<sup>3</sup> *P* value from chi square test for binary variables (e.g., less than college graduate vs. college graduate or higher degree).

<sup>4</sup> Among parous women

<sup>5</sup> In reference year

<sup>6</sup> Between age 12 years and reference age.

<sup>7</sup> Includes controls who completed the food frequency questionnaire. Excludes participants with dietary data considered unreliable (daily caloric intake <600 kcal or >5,000 kcal).

<sup>8</sup> Tertile cutpoints (low <0.72 mg, middle 0.72-2.79, high  $\geq 2.80$  mg per day of total isoflavones) were determined among Asian American cases and controls and U.S.-born non-Hispanic White controls combined.

<sup>9</sup> Excludes 17 controls with missing green tea intake.

<sup>10</sup> Excludes black tea.
