# Supplementary material
Source: PubMed Central journal article supplement (PMC10411517)
Supplement: NIHMS1876070-supplement-3.pdf [file NIHMS1876070-supplement-3.pdf]

**Supplemental Table 3. Prevalence of breast cancer risk factors among foreign-born Asian American cases and controls, by birth cohort**

|                                                                 | Foreign-born Asian American women    |    |                                      |    |                                           |                         |    |                         |    |                                           |
|-----------------------------------------------------------------|--------------------------------------|----|--------------------------------------|----|-------------------------------------------|-------------------------|----|-------------------------|----|-------------------------------------------|
|                                                                 | Cases                                |    |                                      |    |                                           | Controls                |    |                         |    |                                           |
|                                                                 | Born 1931-1950 <sup>1</sup><br>N=293 |    | Born 1951-1984 <sup>2</sup><br>N=282 |    | Chi square<br><i>P</i> value <sup>3</sup> | Born 1931-1950<br>N=122 |    | Born 1951-1984<br>N=197 |    | Chi square<br><i>P</i> value <sup>3</sup> |
| N                                                               | %                                    | N  | %                                    | N  |                                           | %                       | N  | %                       |    |                                           |
| Interviewed in English                                          | 237                                  | 81 | 238                                  | 84 | 0.26                                      | 114                     | 93 | 183                     | 93 | 0.85                                      |
| College graduate or higher degree                               | 139                                  | 47 | 182                                  | 65 | <0.01                                     | 77                      | 63 | 112                     | 57 | 0.29                                      |
| Early menarche before age 12 years                              | 36                                   | 13 | 61                                   | 22 | <0.01                                     | 22                      | 18 | 36                      | 18 | 0.97                                      |
| Nulliparous                                                     | 58                                   | 20 | 78                                   | 28 | 0.02                                      | 21                      | 17 | 53                      | 27 | 0.04                                      |
| ≥3 full-term pregnancies <sup>4</sup>                           | 104                                  | 44 | 37                                   | 18 | <0.01                                     | 41                      | 41 | 39                      | 27 | 0.03                                      |
| First full-term pregnancy at age ≥30 y <sup>4</sup>             | 62                                   | 26 | 88                                   | 43 | <0.01                                     | 32                      | 32 | 56                      | 39 | 0.25                                      |
| History of breast-feeding (ever) <sup>4</sup>                   | 146                                  | 62 | 145                                  | 71 | 0.05                                      | 70                      | 69 | 113                     | 78 | 0.10                                      |
| ≥13 months of breast-feeding <sup>4</sup>                       | 51                                   | 22 | 38                                   | 19 | 0.44                                      | 26                      | 26 | 30                      | 21 | 0.37                                      |
| Oral contraceptive use (ever)                                   | 114                                  | 39 | 132                                  | 47 | 0.046                                     | 65                      | 53 | 95                      | 48 | 0.40                                      |
| Menopausal hormone use (ever),<br>postmenopausal women          | 110                                  | 47 | 7                                    | 23 |                                           | 53                      | 51 | 9                       | 35 |                                           |
| BMI ≥27.5 kg/m <sup>2</sup> , premenopausal women <sup>5</sup>  | 4                                    | 7  | 24                                   | 10 | 0.52                                      | 3                       | 16 | 20                      | 12 | 0.71 <sup>5</sup>                         |
| BMI ≥27.5 kg/m <sup>2</sup> , postmenopausal women <sup>5</sup> | 39                                   | 17 | 4                                    | 13 |                                           | 17                      | 17 | 6                       | 23 |                                           |
| Lifetime physical activity ≥29.6 MET-hours/week <sup>6</sup>    | 47                                   | 16 | 74                                   | 26 | <0.01                                     | 42                      | 34 | 60                      | 30 | 0.50                                      |
| Cigarette smoking (ever)                                        | 18                                   | 6  | 30                                   | 11 | 0.05                                      | 10                      | 8  | 22                      | 11 | 0.40                                      |

|                                                                               |     |    |     |    |      |     |    |     |    |      |
|-------------------------------------------------------------------------------|-----|----|-----|----|------|-----|----|-----|----|------|
| Alcohol consumption (ever)                                                    | 9   | 3  | 19  | 7  | 0.04 | 13  | 11 | 24  | 12 | 0.60 |
| <i>Participants with dietary data</i> <sup>7</sup>                            | 195 |    | 207 |    |      | 101 |    | 144 |    |      |
| Total isoflavone intake, highest tertile ( $\geq 2.80$ mg/day) <sup>5,8</sup> | 128 | 66 | 131 | 63 | 0.62 | 50  | 50 | 71  | 49 | 0.98 |
| Green, herbal or other tea <sup>5,9,10</sup> ( $\geq 2$ cups/week)            | 83  | 43 | 89  | 43 | 0.93 | 47  | 47 | 50  | 35 | 0.06 |

<sup>1</sup> Cases born from 1931-1950 were diagnosed at ages 44-64 years.

<sup>2</sup> Cases born from 1951-1984 were diagnosed at ages 23-55 years.

<sup>3</sup> *P* value from chi square for binary variables (e.g., less than college graduate vs. college graduate or higher degree).

<sup>4</sup> Among parous women.

<sup>5</sup> In reference year.

<sup>6</sup> Between age 12 years and reference age.

<sup>7</sup> Includes participants who completed the food frequency questionnaire. Excludes participants with dietary data considered unreliable (daily caloric intake  $< 600$  kcal or  $> 5,000$  kcal).

<sup>8</sup> Tertile cutpoints (low  $< 0.72$  mg, middle 0.72-2.79, high  $\geq 2.80$  mg per day of total isoflavones) were determined among Asian American cases and controls and U.S.-born non-Hispanic White controls combined.

<sup>9</sup> Excludes 3 foreign-born women with missing green tea intake.

<sup>10</sup> Excludes black tea.
