# Supplementary material
Source: PubMed Central journal article supplement (PMC10411517)
Supplement: NIHMS1876070-supplement-4.pdf [file NIHMS1876070-supplement-4.pdf]

**Supplemental Table 4. Prevalence of breast cancer risk factors among foreign-born Asian American cases and controls aged 44-55 years, by birth cohort**

|                                                              | Foreign-born Asian American women |    |                         |    |                                           |                        |    |                        |    |                                           |
|--------------------------------------------------------------|-----------------------------------|----|-------------------------|----|-------------------------------------------|------------------------|----|------------------------|----|-------------------------------------------|
|                                                              | Cases                             |    |                         |    |                                           | Controls               |    |                        |    |                                           |
|                                                              | Born 1931-1950<br>N=152           |    | Born 1951-1984<br>N=117 |    | Chi square<br><i>P</i> value <sup>1</sup> | Born 1931-1950<br>N=59 |    | Born 1951-1984<br>N=86 |    | Chi square<br><i>P</i> value <sup>1</sup> |
| N                                                            | %                                 | N  | %                       | N  |                                           | %                      | N  | %                      |    |                                           |
| Interviewed in English                                       | 127                               | 84 | 89                      | 76 | 0.13                                      | 54                     | 92 | 78                     | 91 | 0.86                                      |
| College graduate or higher degree                            | 74                                | 49 | 71                      | 61 | 0.05                                      | 37                     | 63 | 53                     | 62 | 0.89                                      |
| Early menarche before age 12 years                           | 26                                | 17 | 27                      | 23 | 0.24                                      | 17                     | 29 | 12                     | 14 | 0.03                                      |
| Nulliparous                                                  | 31                                | 20 | 26                      | 22 | 0.72                                      | 8                      | 14 | 14                     | 16 | 0.65                                      |
| ≥3 full-term pregnancies <sup>2</sup>                        | 44                                | 36 | 18                      | 20 | 0.01                                      | 19                     | 37 | 25                     | 35 | 0.77                                      |
| First full-term pregnancy at age ≥30 y <sup>2</sup>          | 29                                | 24 | 42                      | 46 | <0.01                                     | 13                     | 25 | 27                     | 38 | 0.16                                      |
| History of breast-feeding (ever) <sup>2</sup>                | 67                                | 44 | 62                      | 68 | 0.06                                      | 32                     | 63 | 56                     | 78 | 0.07                                      |
| ≥13 months of breast-feeding <sup>2</sup>                    | 22                                | 18 | 19                      | 21 | 0.62                                      | 11                     | 22 | 17                     | 24 | 0.79                                      |
| Oral contraceptive use (ever)                                | 63                                | 41 | 55                      | 47 | 0.36                                      | 36                     | 61 | 45                     | 52 | 0.30                                      |
| BMI ≥27.5 kg/m <sup>2</sup> <sup>3</sup>                     | 20                                | 13 | 13                      | 11 | 0.61                                      | 10                     | 17 | 16                     | 19 | 0.80                                      |
| Lifetime physical activity ≥29.6 MET-hours/week <sup>4</sup> | 27                                | 18 | 32                      | 27 | 0.06                                      | 19                     | 32 | 19                     | 22 | 0.17                                      |
| Cigarette smoking (ever)                                     | 12                                | 8  | 13                      | 11 | 0.37                                      | 7                      | 12 | 5                      | 6  | 0.22 <sup>5</sup>                         |
| Alcohol consumption (ever)                                   | 7                                 | 5  | 11                      | 9  | 0.12                                      | 5                      | 8  | 7                      | 8  | 0.94 <sup>5</sup>                         |
| <i>Participants with dietary data</i> <sup>6</sup>           | 108                               |    | 85                      |    |                                           | 48                     |    | 58                     |    |                                           |

|                                                                               |    |    |    |    |      |    |    |    |    |      |
|-------------------------------------------------------------------------------|----|----|----|----|------|----|----|----|----|------|
| Total isoflavone intake, highest tertile ( $\geq 2.80$ mg/day) <sup>3,7</sup> | 72 | 67 | 62 | 73 | 0.35 | 25 | 52 | 25 | 43 | 0.36 |
| Green, herbal or other tea <sup>3,8</sup> ( $\geq 2$ cups/week)               | 39 | 36 | 43 | 50 | 0.04 | 19 | 40 | 24 | 41 | 0.85 |

<sup>1</sup> *P* value from chi square for binary variables (e.g., less than college graduate vs. college graduate or higher degree).

<sup>2</sup> Among parous women.

<sup>3</sup> In reference year.

<sup>4</sup> Between age 12 years and reference age.

<sup>5</sup> *P* value from Fisher's exact test.

<sup>6</sup> Includes participants who completed the food frequency questionnaire. Excludes participants with dietary data considered unreliable (daily caloric intake  $< 600$  kcal or  $> 5,000$  kcal).

<sup>7</sup> Tertile cutpoints (low  $< 0.72$  mg, middle 0.72-2.79, high  $\geq 2.80$  mg per day of total isoflavones) were determined among Asian American cases and controls and U.S.-born non-Hispanic White controls combined.

<sup>8</sup> Excludes black tea.
