# Supplementary material
Source: PubMed Central journal article supplement (PMC10411517)
Supplement: NIHMS1876070-supplement-5.pdf [file NIHMS1876070-supplement-5.pdf]

**Supplemental Table 5. Prevalence of breast cancer risk factors among Asian American and non-Hispanic White women born from 1951-1984, by birthplace**

|                                                                        | Foreign-born Asian American cases<br>N=282 |    | U.S.-born Asian American cases<br>N=73 |    | Foreign-born vs. U.S.-born Asian American cases<br><br>Chi square<br>P value <sup>1</sup> | Foreign-born Asian American controls<br>N=197 |    | U.S.-born Asian American controls<br>N=79 |    | U.S.-born NHW controls<br>N=458 |    | Foreign-born vs. U.S.-born Asian American controls<br><br>Chi square<br>P value <sup>1</sup> | U.S.-born Asian American vs. NHW controls<br><br>Chi square<br>P value <sup>1</sup> |
|------------------------------------------------------------------------|--------------------------------------------|----|----------------------------------------|----|-------------------------------------------------------------------------------------------|-----------------------------------------------|----|-------------------------------------------|----|---------------------------------|----|----------------------------------------------------------------------------------------------|-------------------------------------------------------------------------------------|
|                                                                        | N                                          | %  | N                                      | %  |                                                                                           | N                                             | %  | N                                         | %  | N                               | %  |                                                                                              |                                                                                     |
| College graduate or higher degree                                      | 182                                        | 65 | 50                                     | 68 | 0.53                                                                                      | 112                                           | 57 | 45                                        | 57 | 215                             | 47 | 0.99                                                                                         | 0.11                                                                                |
| Early menarche before age 12 years                                     | 61                                         | 22 | 15                                     | 21 | 0.81                                                                                      | 36                                            | 18 | 12                                        | 15 | 83                              | 18 | 0.57                                                                                         | 0.55                                                                                |
| Nulliparous                                                            | 78                                         | 28 | 36                                     | 49 | <0.01                                                                                     | 53                                            | 27 | 30                                        | 38 | 158                             | 34 | 0.07                                                                                         | 0.55                                                                                |
| ≥3 full-term pregnancies <sup>2</sup>                                  | 37                                         | 18 | 6                                      | 16 | 0.78                                                                                      | 39                                            | 27 | 15                                        | 31 | 87                              | 29 | 0.63                                                                                         | 0.82                                                                                |
| First full-term pregnancy at age ≥30 y <sup>2</sup>                    | 88                                         | 43 | 21                                     | 57 | 0.13                                                                                      | 56                                            | 39 | 19                                        | 39 | 84                              | 28 | 0.99                                                                                         | 0.13                                                                                |
| History of breast-feeding (ever) <sup>2</sup>                          | 145                                        | 71 | 34                                     | 92 | <0.01 <sup>3</sup>                                                                        | 113                                           | 78 | 42                                        | 86 | 253                             | 84 | 0.27                                                                                         | 0.80                                                                                |
| ≥13 months of breast-feeding <sup>2</sup>                              | 38                                         | 19 | 7                                      | 19 | 0.96                                                                                      | 30                                            | 21 | 21                                        | 43 | 120                             | 40 | <0.01                                                                                        | 0.71                                                                                |
| Oral contraceptive use (ever)                                          | 132                                        | 47 | 45                                     | 62 | 0.02                                                                                      | 95                                            | 48 | 58                                        | 73 | 407                             | 89 | <0.01                                                                                        | <0.01                                                                               |
| BMI ≥27.5 kg/m <sup>2</sup> <sup>4</sup>                               | 24                                         | 10 | 7                                      | 10 | 0.89                                                                                      | 20                                            | 12 | 14                                        | 20 | 85                              | 23 | 0.09                                                                                         | 0.6                                                                                 |
| Lifetime physical activity ≥29.6 MET-hours/week <sup>5</sup>           | 74                                         | 26 | 36                                     | 49 | <0.01                                                                                     | 60                                            | 30 | 32                                        | 41 | 215                             | 47 | 0.11                                                                                         | 0.28                                                                                |
| Cigarette smoking (ever)                                               | 19                                         | 7  | 13                                     | 18 | <0.01                                                                                     | 22                                            | 11 | 20                                        | 25 | 199                             | 43 | <0.01                                                                                        | <0.01                                                                               |
| Alcohol consumption (ever)                                             | 30                                         | 11 | 16                                     | 22 | 0.01                                                                                      | 24                                            | 12 | 24                                        | 30 | 259                             | 57 | 0.01                                                                                         | <0.01                                                                               |
| <i>Participants with dietary data</i> <sup>6</sup>                     | 207                                        |    | 65                                     |    |                                                                                           | 144                                           |    | 74                                        |    | 394                             |    |                                                                                              |                                                                                     |
| Total isoflavone intake, highest tertile (≥2.80 mg/day) <sup>4,7</sup> | 131                                        | 63 | 28                                     | 43 | <0.01                                                                                     | 71                                            | 21 | 21                                        | 28 | 46                              | 12 | <0.01                                                                                        | 0.02                                                                                |

|                                                                   |    |    |    |    |      |    |    |    |    |     |    |      |      |
|-------------------------------------------------------------------|----|----|----|----|------|----|----|----|----|-----|----|------|------|
| Green, herbal or other tea <sup>4,8,9</sup> ( $\geq 2$ cups/week) | 89 | 43 | 24 | 38 | 0.39 | 50 | 35 | 25 | 34 | 100 | 25 | 0.89 | 0.13 |
|-------------------------------------------------------------------|----|----|----|----|------|----|----|----|----|-----|----|------|------|

---

<sup>1</sup> *P* value from chi square for binary variables (e.g., less than college graduate vs. college graduate or higher degree).

<sup>2</sup> Among parous women.

<sup>3</sup> *P* value from Fisher's exact test

<sup>4</sup> In reference year.

<sup>5</sup> Between age 12 years and reference age.

<sup>6</sup> Includes controls born between 1951-1884 who completed the food frequency questionnaire. Excludes participants with dietary data considered unreliable (daily caloric intake <600 kcal or >5,000 kcal).

<sup>7</sup> Tertile cutpoints (low <0.72 mg, middle 0.72-2.79, high  $\geq 2.80$  mg per day of total isoflavones) were determined among Asian American cases and controls and U.S.-born non-Hispanic White controls combined.

<sup>8</sup> Excludes 4 women with missing green tea intake.

<sup>9</sup> Excludes black tea.
