# Supplementary material
Source: PubMed Central journal article supplement (PMC10411517)

**Supplemental Figure 1. Prevalence of breast cancer risk factors among Asian American cases born 1951-1984, by birthplace**

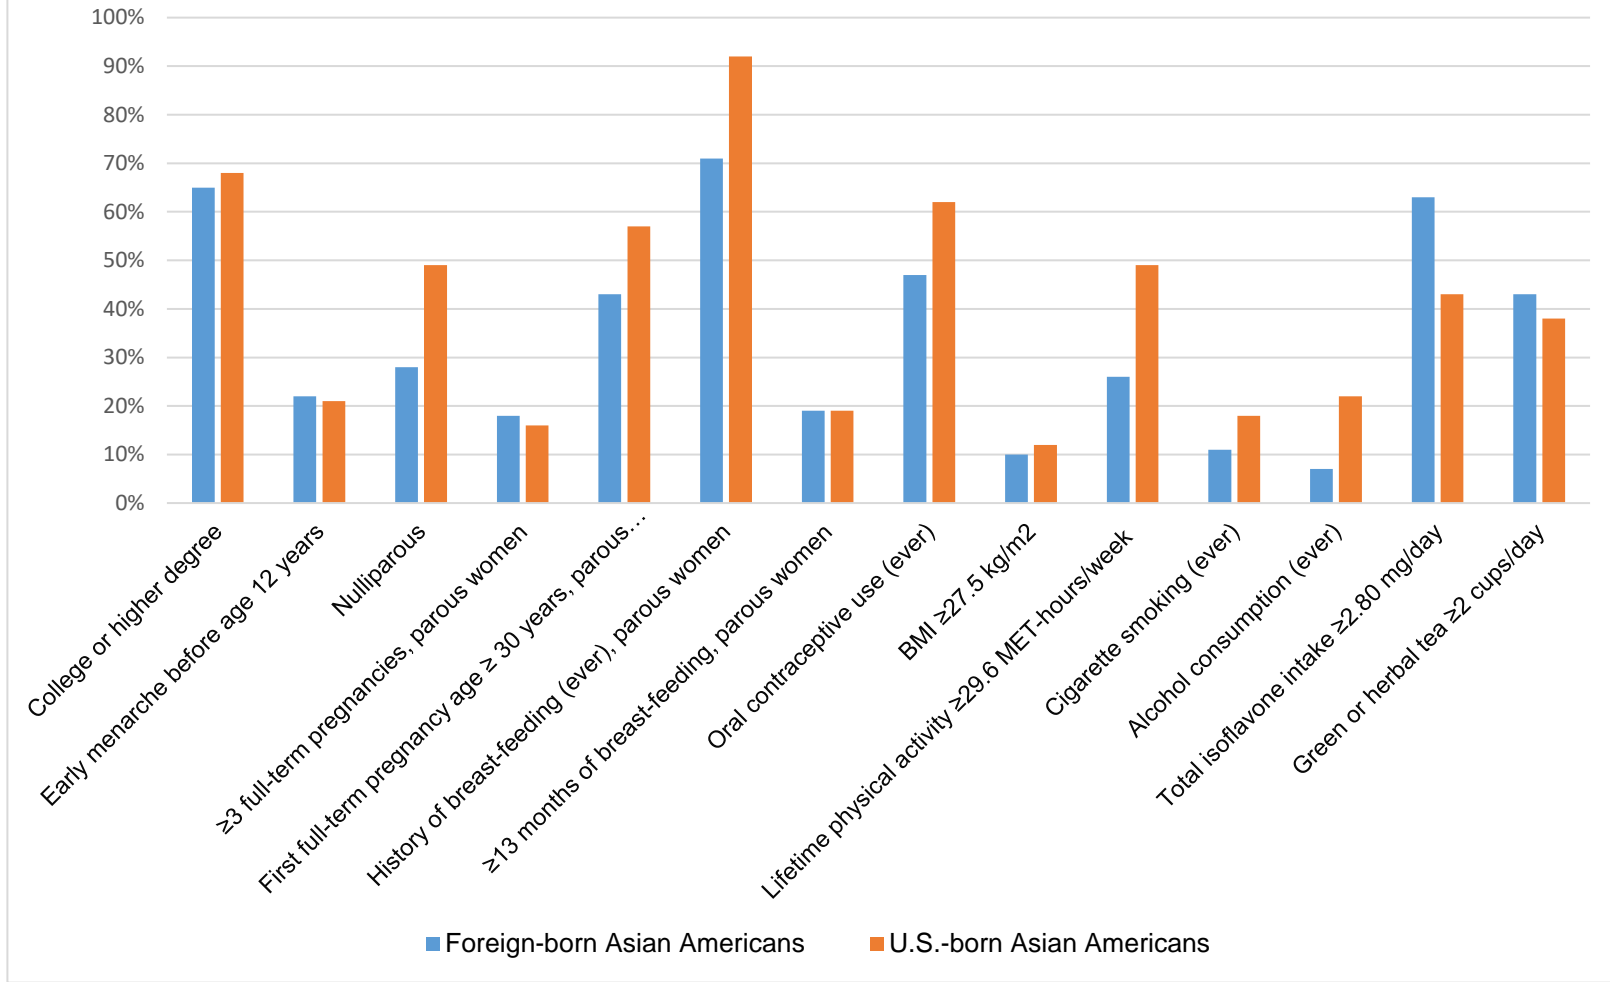

Supplement: NIHMS1876070-supplement-6.pdf [file NIHMS1876070-supplement-6.pdf]
