# Supplementary material
Source: PubMed Central journal article supplement (PMC10411517)

**Supplemental Figure 2. Prevalence of breast cancer risk factors among Asian American controls by birthplace and U.S.-born non-Hispanic White controls, born 1951-1984**

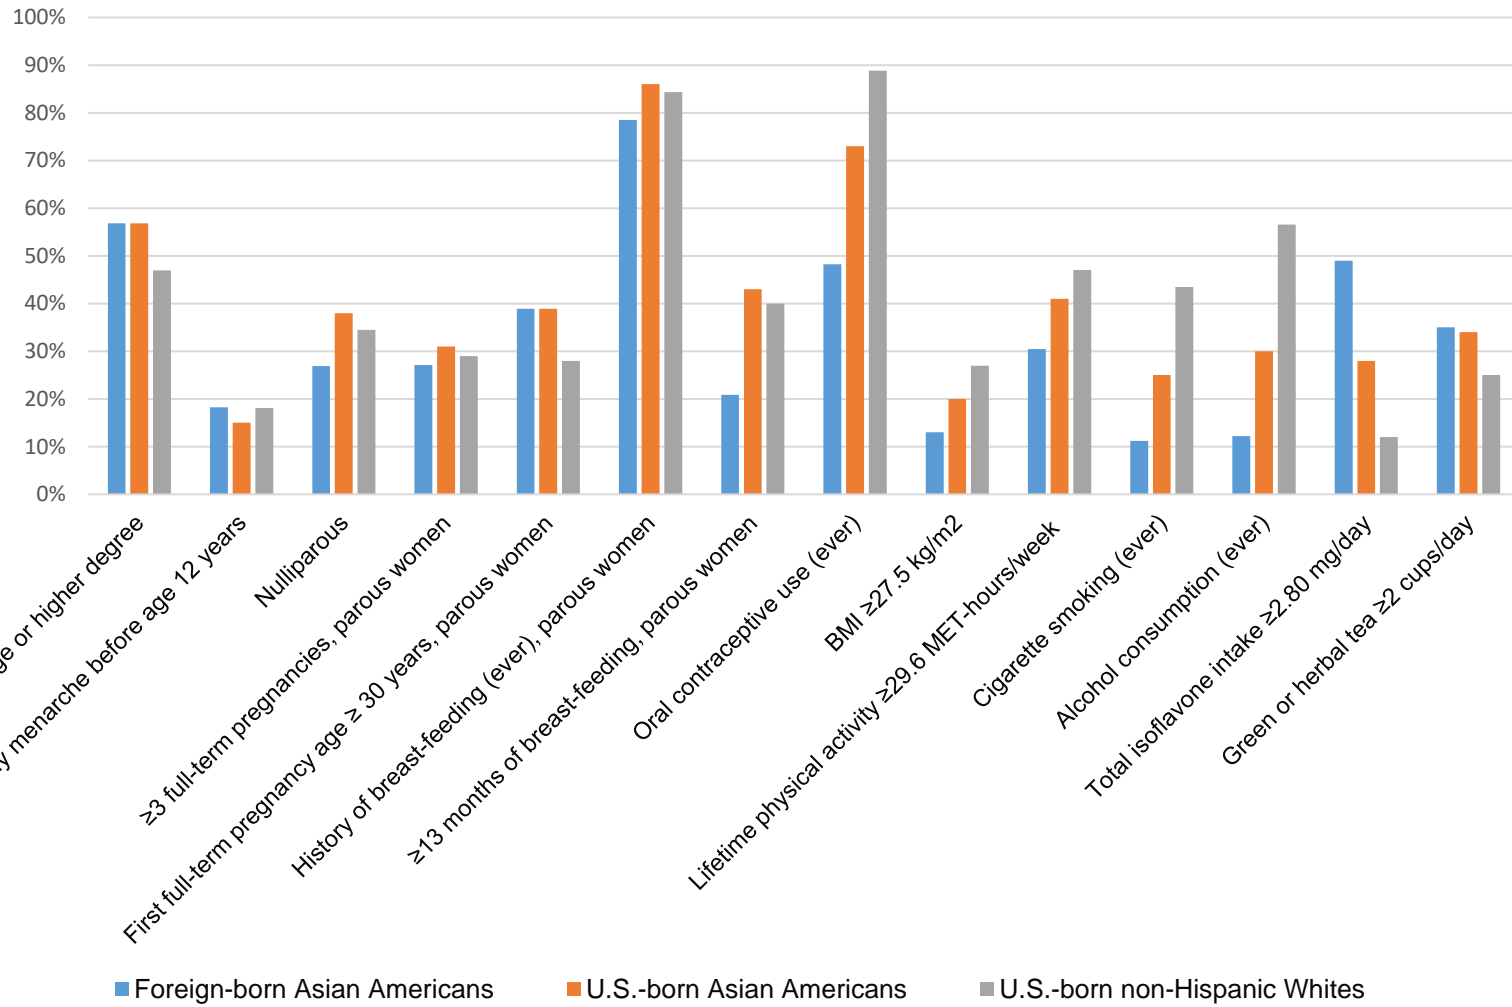

Supplement: NIHMS1876070-supplement-7.pdf [file NIHMS1876070-supplement-7.pdf]
